# Supplementary material for: CystiSim – An Agent-Based Model for Taenia solium Transmission and Control
Source: PubMed Central journal article supplement (PMC5161321; doi:10.1371/journal.pntd.0005184), 2016-12-16
Supplement: pntd.0005184.s002.pdf [file pntd.0005184.s002.pdf]

# cystiSim—an agent-based model for *Taenia solium* transmission and control

## S1 Appendix. Mbeya and Mbozi baseline model.

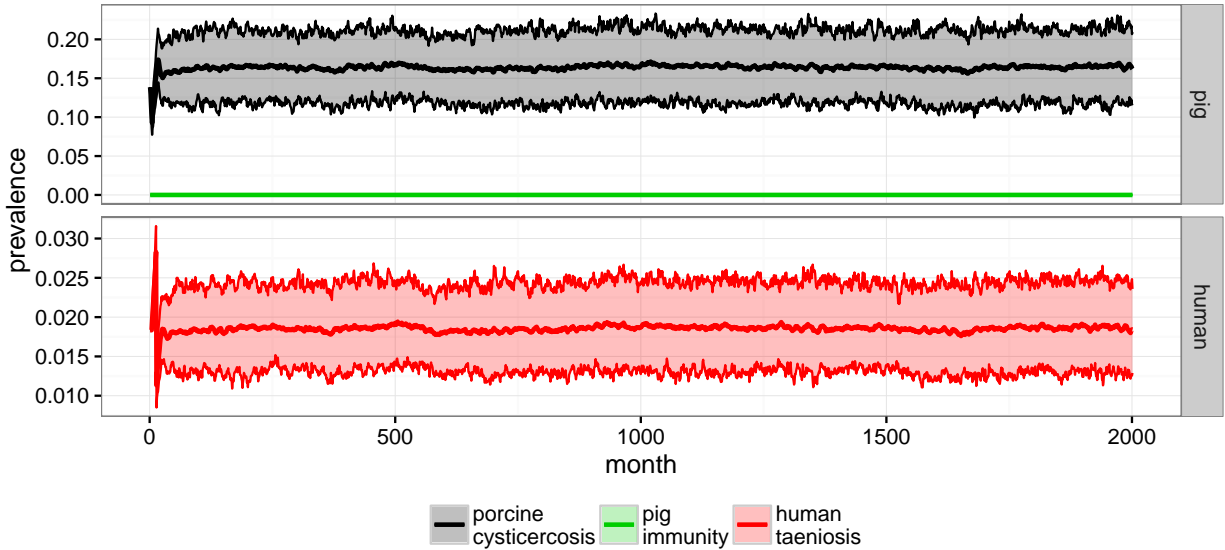

Figure 1: Mbeya baseline model; mean prevalence and 95% uncertainty interval based on 100 simulations of 2000 months each. Parameter settings:  $ph2m = 0.00017$ ;  $pl2m = 0.00015$ ;  $m2p = 0.00007$ ;  $e2p = 0.00023$ ;  $age.coef = (-5, 0.03)$ .

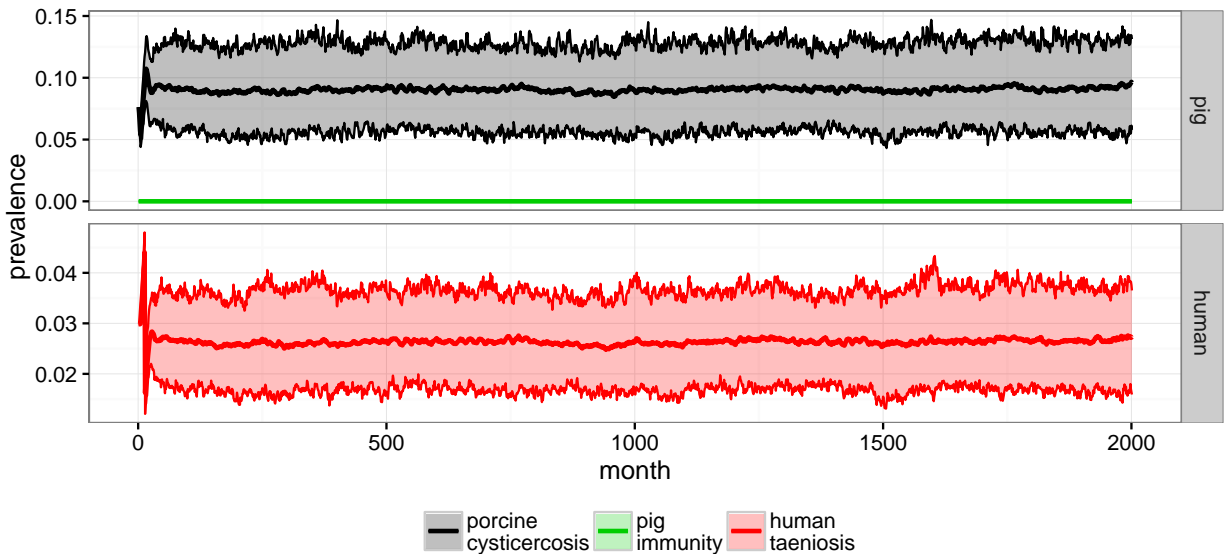

Figure 2: Mbozi baseline model; mean prevalence and 95% uncertainty interval based on 100 simulations of 2000 months each. Parameter settings:  $ph2m = 0.00029$ ;  $pl2m = 0.00044$ ;  $m2p = 0.00003$ ;  $e2p = 0.00007$ ;  $age.coef = (-4, 0.02)$ .
