# Supplementary material for: CystiSim – An Agent-Based Model for Taenia solium Transmission and Control
Source: PubMed Central journal article supplement (PMC5161321; doi:10.1371/journal.pntd.0005184), 2016-12-16
Supplement: pntd.0005184.s003.pdf [file pntd.0005184.s003.pdf]

# cystiSim—an agent-based model for *Taenia solium* transmission and control

## S2 Appendix. Mbozi intervention and elimination models.

| ID     | Strategy                          | Human age group | Coverage                   | Porcine                                 | Human                               |
|--------|-----------------------------------|-----------------|----------------------------|-----------------------------------------|-------------------------------------|
|        |                                   |                 |                            | cysticercosis<br><i>Pr(elimination)</i> | taeniosis<br><i>Pr(elimination)</i> |
| INT-1  | human MDA 4q12                    | All             | 75%                        | 0.000                                   | 0.000                               |
| INT-2  | human MDA 4q12                    | SAC             | 90%                        | 0.000                                   | 0.000                               |
| INT-3  | pig MDA 11q4                      | All             | 90%                        | 0.868                                   | 0.864                               |
| INT-4  | pig MDA 11q4                      | All             | 75%                        | 0.541                                   | 0.536                               |
| INT-5  | pig MDA&VAC 11q4                  | All             | 90%                        | 0.979                                   | 0.979                               |
| INT-6  | pig MDA&VAC 11q4                  | All             | 75%                        | 0.771                                   | 0.767                               |
| INT-7  | human MDA 4q12 + pig MDA 11q4     | SAC             | 90% (Humans)<br>75% (Pigs) | 0.665                                   | 0.653                               |
| INT-8  | human MDA 4q12 + pig MDA 11q4     | All             | 75%                        | 0.862                                   | 0.856                               |
| INT-9  | human MDA 4q12 + pig MDA&VAC 11q4 | SAC             | 90% (Humans)<br>75% (Pigs) | 0.844                                   | 0.835                               |
| INT-10 | human MDA 4q12 + pig MDA&VAC 11q4 | All             | 75%                        | 0.947                                   | 0.943                               |

Table 1: Probability of *Taenia solium* elimination in human and porcine hosts in Mbozi district by simulation in **cystiSim**. Efficacy of was fixed at 90%. MDA: Mass Drug Administration; VAC: Vaccination; SAC: School-Age Children;  $xy$ :  $x$  treatments with  $y$  months interval.

| ID     | Strategy                | Human age group | Porcine cysticercosis,                         | Human taeniosis,                               |
|--------|-------------------------|-----------------|------------------------------------------------|------------------------------------------------|
|        |                         |                 | months till elimination<br><i>mean (range)</i> | months till elimination<br><i>mean (range)</i> |
| ELIM-1 | Human MDA               | All             | 313 (119–1080)                                 | 310 (120–1080)                                 |
| ELIM-2 | Pig MDA                 | Not applicable  | 49 (24–120)                                    | 51 (27–124)                                    |
| ELIM-3 | Pig MDA+VAC             | Not applicable  | 39 (20–88)                                     | 43 (24–90)                                     |
| ELIM-4 | Human MDA & Pig MDA+VAC | SAC             | 38 (20–94)                                     | 41 (23–107)                                    |
| ELIM-5 | Human MDA & Pig MDA+VAC | All             | 30 (14–84)                                     | 33 (17–79)                                     |

Table 2: Duration of months until elimination of *Taenia solium* in human and porcine hosts was achieved in Mbozi district by simulation in **cystiSim**. Efficacy of was fixed at 90%. Coverage of mass drug administration (MDA) to school-age children (SAC) was set to 90% and for MDA to the whole human population (All) and for pig interventions to 75%. MDA: Mass Drug Administration; VAC: Vaccination; SAC: School-Age Children;  $xy$ :  $x$  treatments with  $y$  months interval.

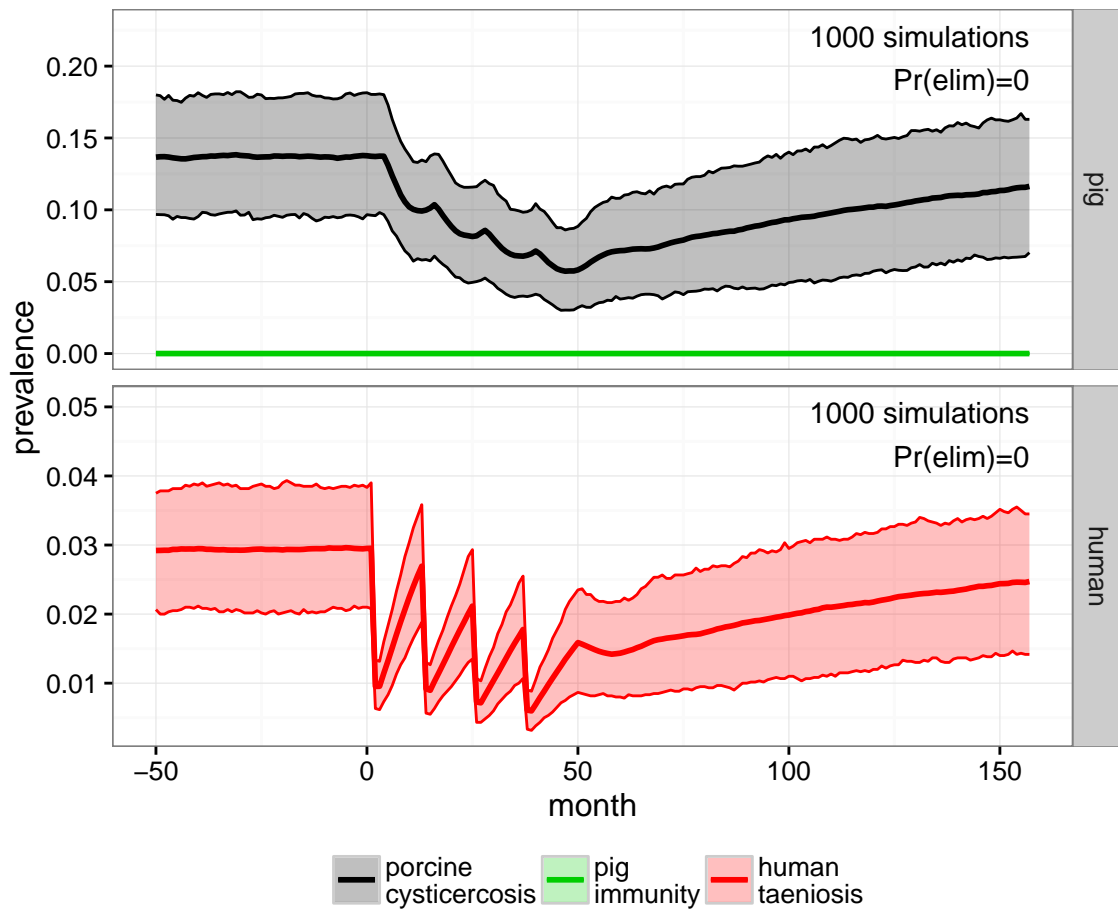

Figure 1: Outcome of the MDA to the whole population with 75% coverage for Mbozi district after 1000 simulations in **cystiSim**. Efficacy was set at 90%. The coloured area demarcates the 95% uncertainty intervals for prevalence. The green line illustrates pig immunity towards new infections and  $\text{Pr}(\text{elim})$  states the predicted probability of elimination occurring in the given scenario.

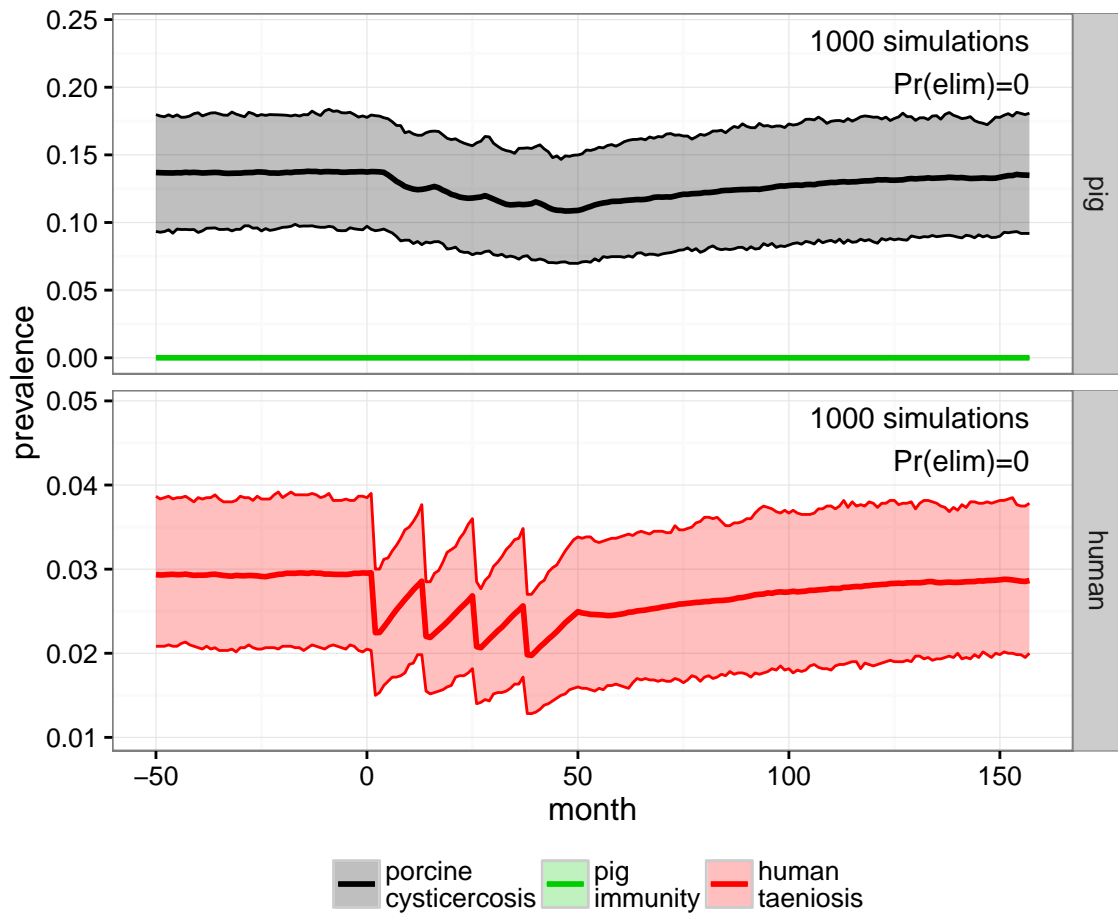

Figure 2: Outcome of the MDA to school-aged children with 90% coverage for Mbozi district after 1000 simulations in **cystiSim**. Efficacy was set at 90%. The coloured area demarcates the 95% uncertainty intervals for prevalence. The green line illustrates pig immunity towards new infections and  $\text{Pr}(\text{elim})$  states the predicted probability of elimination occurring in the given scenario.

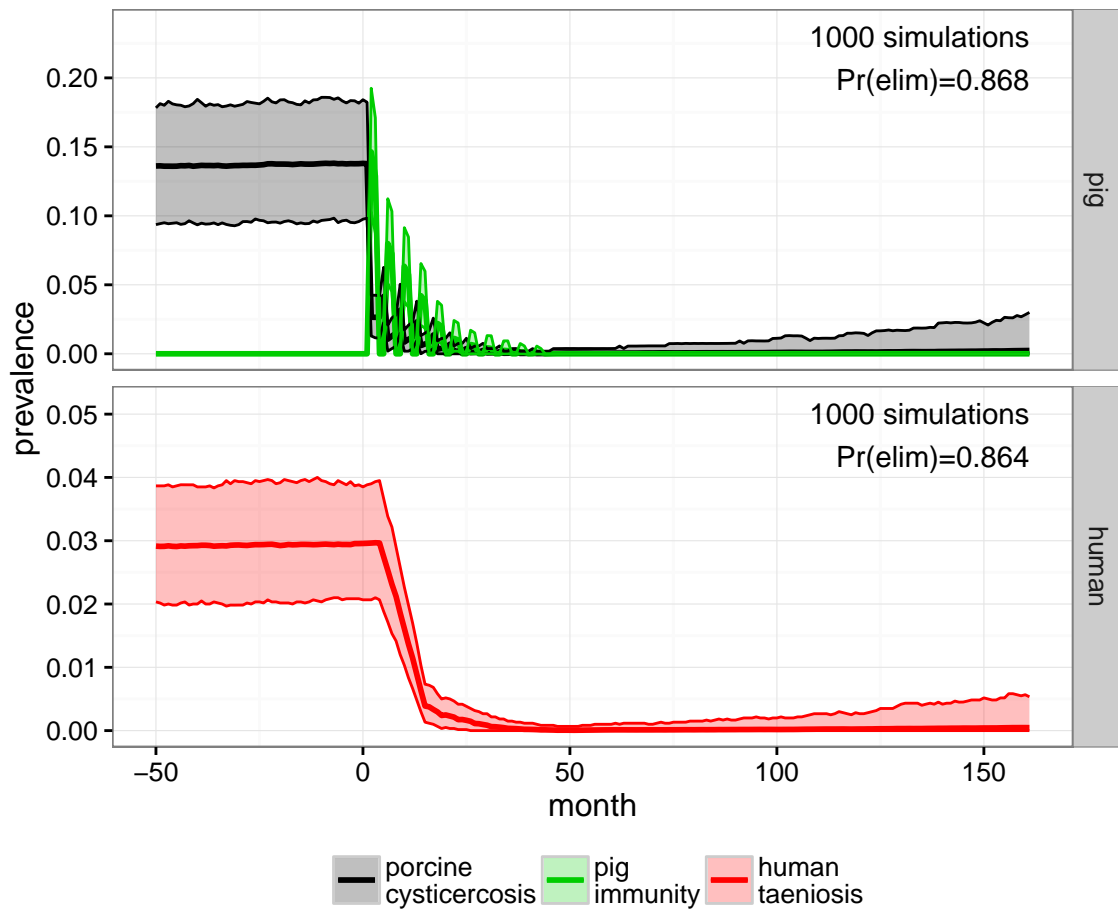

Figure 3: Outcome of the porcine population treatment with 90% coverage for Mbozi district after 1000 simulations in **cystiSim**. Efficacy was set at 90%. The coloured area demarcates the 95% uncertainty intervals for prevalence. The green line illustrates pig immunity towards new infections and  $\text{Pr}(\text{elim})$  states the predicted probability of elimination occurring in the given scenario.

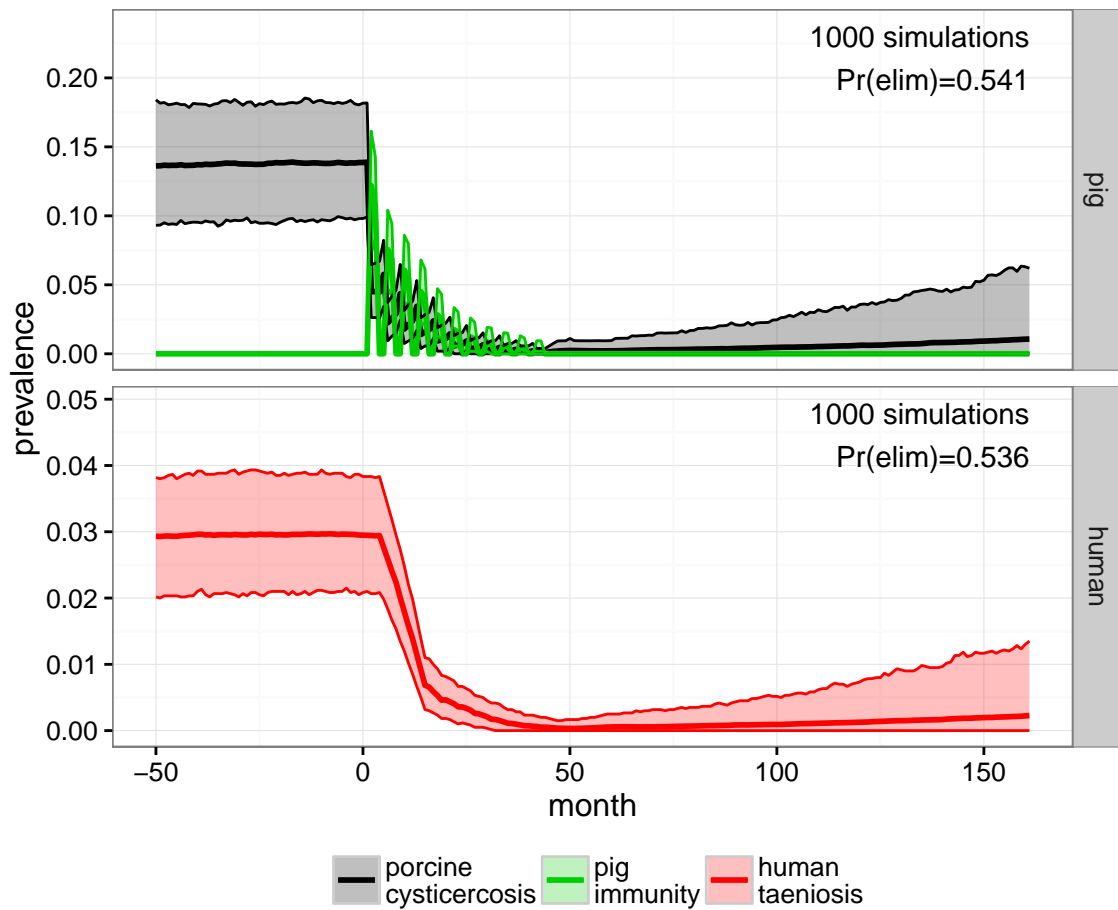

Figure 4: Outcome of the porcine population treatment with 75% coverage for Mbozi district after 1000 simulations in **cystiSim**. Efficacy was set at 90%. The coloured area demarcates the 95% uncertainty intervals for prevalence. The green line illustrates pig immunity towards new infections and  $\text{Pr}(\text{elim})$  states the predicted probability of elimination occurring in the given scenario.

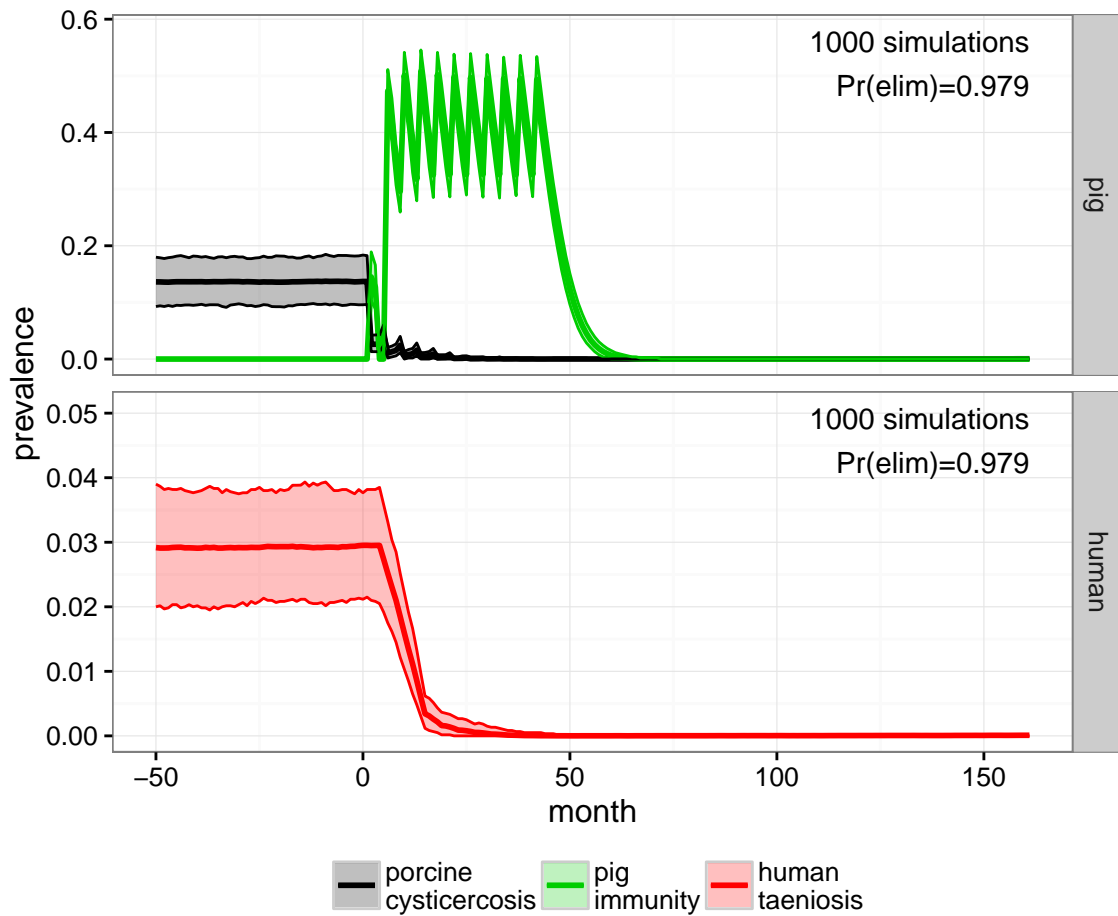

Figure 5: Outcome of anthelmintic treatment and vaccination of the porcine population with 90% coverage for Mbozi district after 1000 simulations in **cystiSim**. Efficacy was set at 90%. The coloured area demarcates the 95% uncertainty intervals for prevalence. The green line illustrates pig immunity towards new infections and Pr(elim) states the predicted probability of elimination occurring in the given scenario.

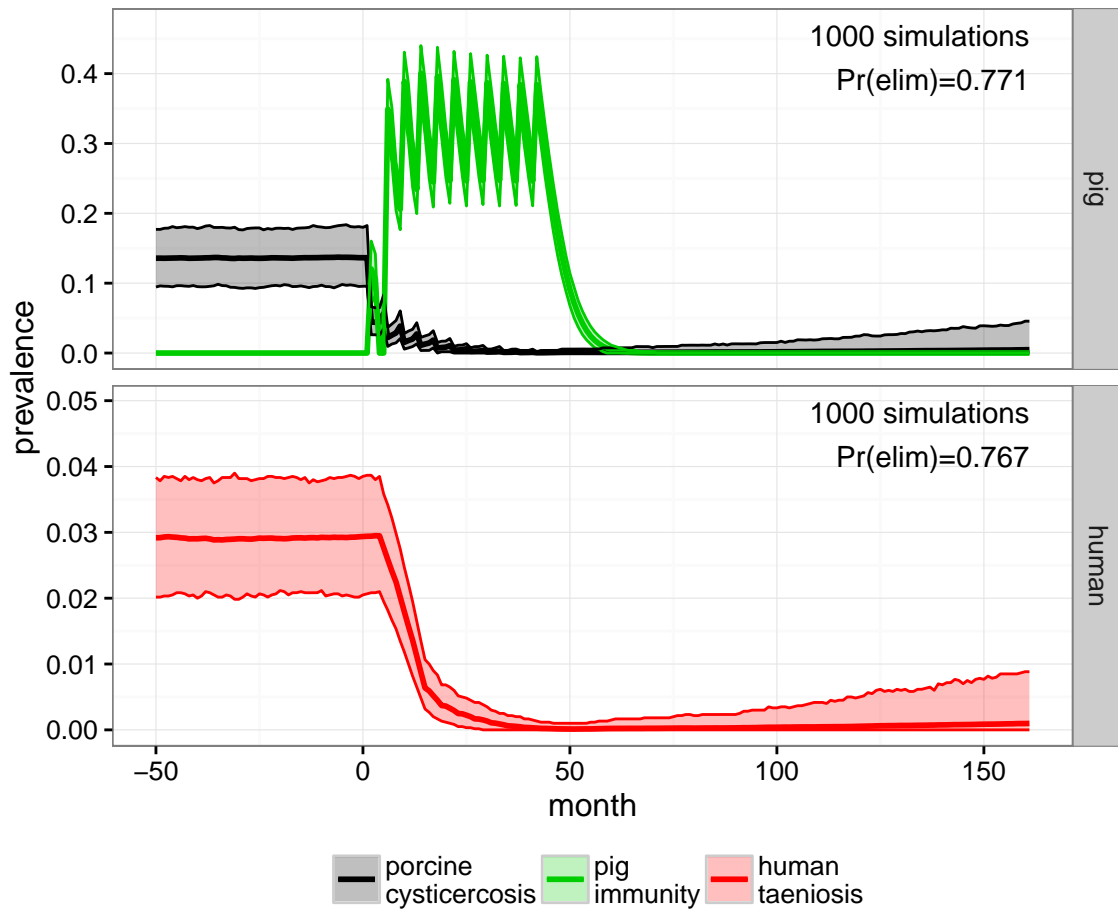

Figure 6: Outcome of anthelmintic treatment and vaccination of the porcine population with 75% coverage for Mbozi district after 1000 simulations in **cystiSim**. Efficacy was set at 90%. The coloured area demarcates the 95% uncertainty intervals for prevalence. The green line illustrates pig immunity towards new infections and  $\text{Pr}(\text{elim})$  states the predicted probability of elimination occurring in the given scenario.

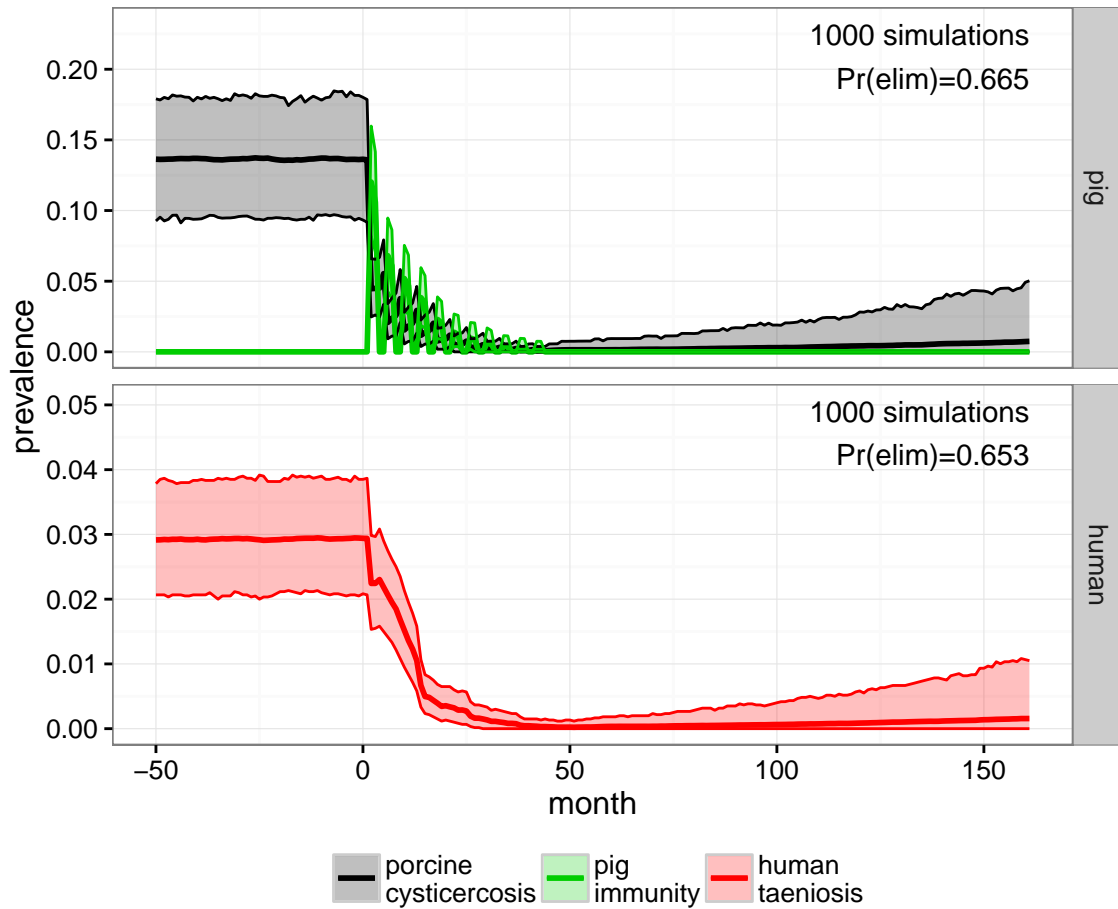

Figure 7: Outcome of MDA to school-aged children with 90% coverage in combination with anthelmintic treatment of the porcine population with 75% coverage for Mbozi district after 1000 simulations in **cystiSim**. Efficacy was set at 90%. The coloured area demarcates the 95% uncertainty intervals for prevalence. The green line illustrates pig immunity towards new infections and  $\text{Pr}(\text{elim})$  states the predicted probability of elimination occurring in the given scenario.



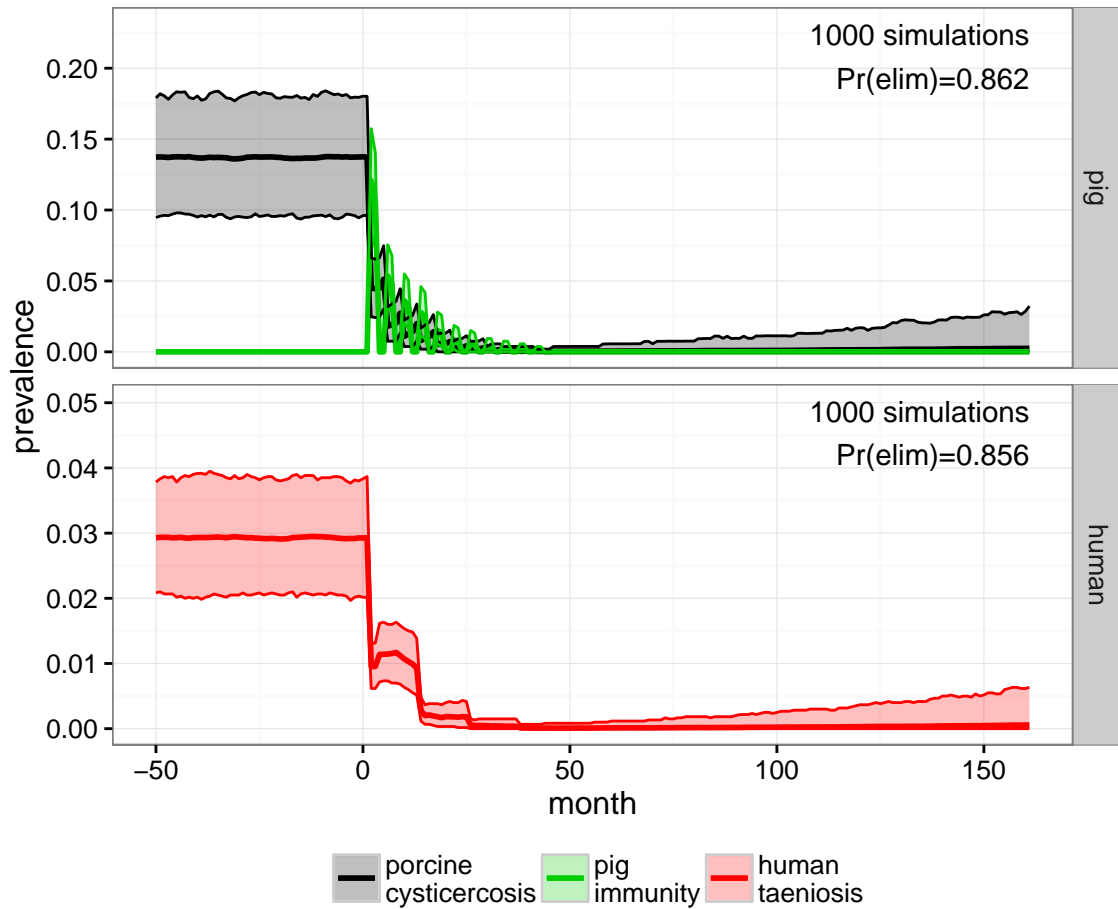

Figure 8: Outcome of MDA to the whole human population in combination with anthelmintic treatment of the porcine population both with 75% coverage (on the right) for Mbozi district after 1000 simulations in **cystiSim**. Efficacy was set at 90%. The coloured area demarcates the 95% uncertainty intervals for prevalence. The green line illustrates pig immunity towards new infections and  $\text{Pr}(\text{elim})$  states the predicted probability of elimination occurring in the given scenario.

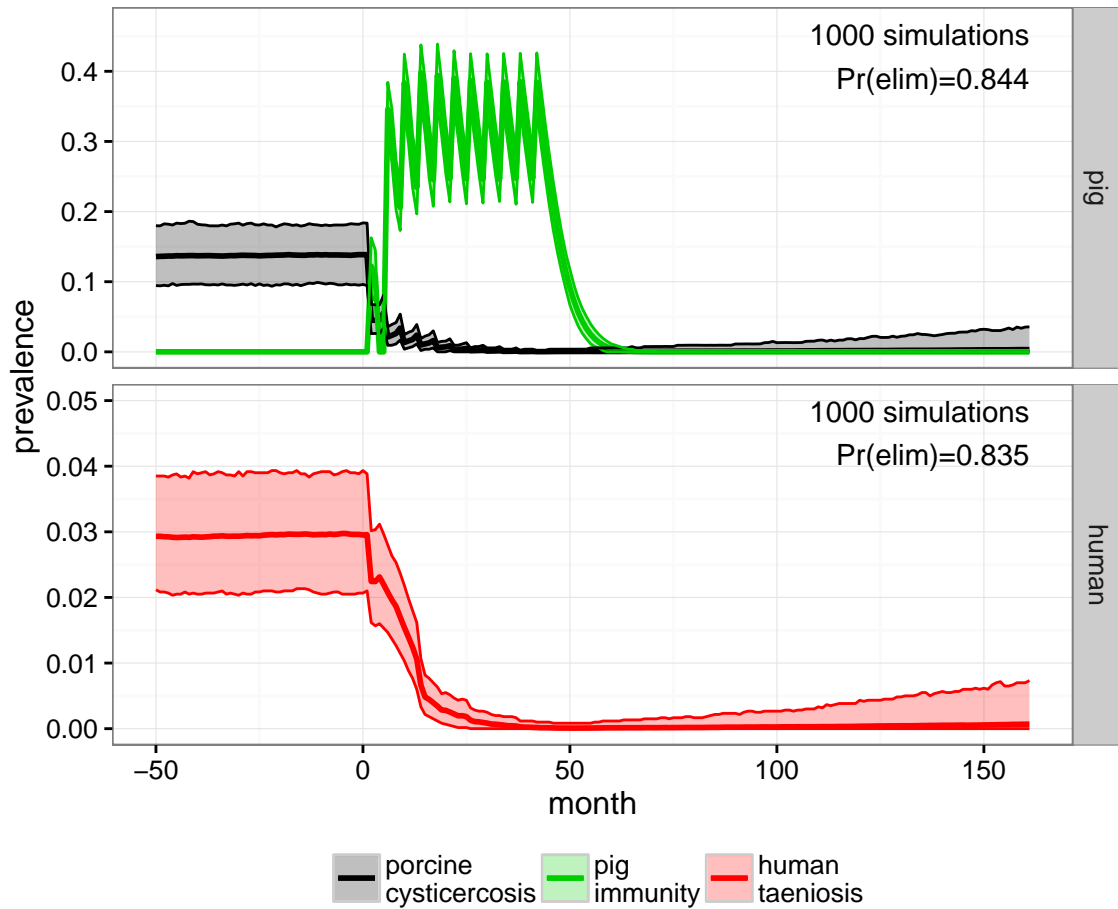

Figure 9: Outcome of MDA to school-aged children with 90% coverage in combination with anthelmintic treatment and vaccination of the porcine population with 75% coverage for Mbozi district after 1000 simulations in **cystiSim**. Efficacy was set at 90%. The coloured area demarcates the 95% uncertainty intervals for prevalence. The green line illustrates pig immunity towards new infections and  $\text{Pr}(\text{elim})$  states the predicted probability of elimination occurring in the given scenario.

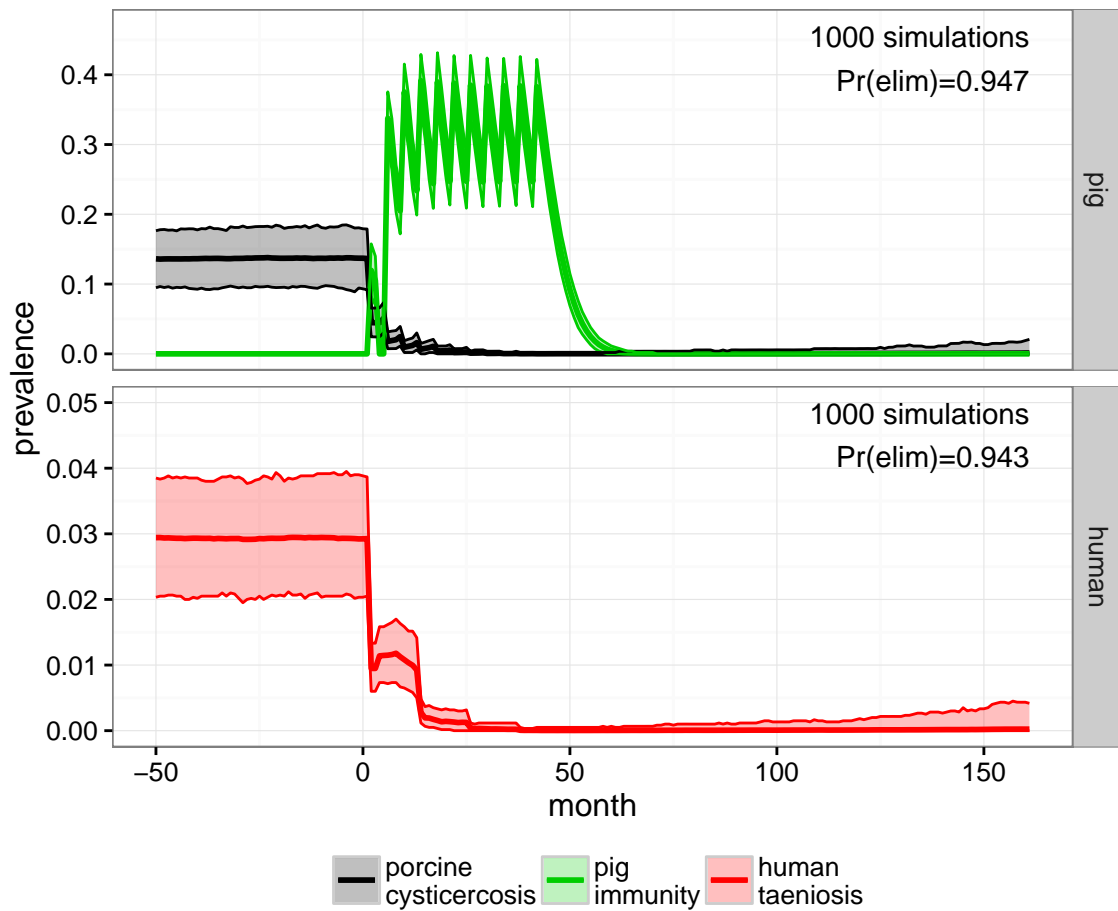

Figure 10: Outcome of MDA to the whole human population in combination with anthelmintic treatment and vaccination of the porcine population both with 75% coverage for Mbozi district after 1000 simulations in **cystiSim**. Efficacy was set at 90%. The coloured area demarcates the 95% uncertainty intervals for prevalence. The green line illustrates pig immunity towards new infections and Pr(elim) states the predicted probability of elimination occurring in the given scenario.
